# Supplementary material
Source: publisher figshare collection journal article supplement (https://acs.figshare.com/ndownloader/files/4182826)
Supplement: Supplementary file 1 [file 4182826]

# Supporting Information

## Polyporous Metal-Coordination Frameworks

Jeremiah J. Gassensmith<sup>†</sup>, Ronald A. Smaldone<sup>†</sup>, Ross S. Forgan<sup>†</sup>, Christopher E. Wilmer<sup>†</sup>, David B. Cordes<sup>‡</sup>, Youssry Y. Botros<sup>†,§,||</sup>, Alexandra M. Z. Slawin<sup>‡</sup>, Randall Q. Snurr<sup>‡</sup> and J. Fraser Stoddart<sup>\*,†,‡</sup>

<sup>†</sup> Center for the Chemistry of Integrated Systems, Department of Chemistry, Department of Materials Science, Department of Chemical & Biological Engineering, Northwestern University, 2145 Sheridan Road, Evanston, IL 60208

<sup>‡</sup> NanoCentury KAIST Institute and Graduate School of EEWS (WCU) Korea Advanced Institute of Science and Technology (KAIST) □ 373-1 Guseong Dong, Yuseong Gu, Daejeon 305-701, Republic of Korea

<sup>‡</sup> University of St. Andrews Purdie Building, St. Andrews, Fife, KY16 9ST, UK

<sup>§</sup> Intel Labs, Building RNB-6-61, 2200 Mission College Boulevard, Santa Clara, CA 95054

<sup>||</sup> National Center for Nano Technology Research □ King Abdulaziz City for Science and Technology (KACST) □ P.O. Box 6086, Riyadh 11442, Kingdom of Saudi Arabia

**\* To whom Correspondences should be Addressed**

**Professor J Fraser Stoddart**  
Department of Chemistry  
Northwestern University  
2145 Sheridan Road  
Evanston, Illinois 60208-3113  
Tel: (+1)-847-491-3793  
Fax: (+1)-847-491-1009 □  
E-Mail: stoddart@northwestern.edu

## Section 1. Figure for simulated nitrogen uptake

Grand canonical Monte Carlo simulations (Figure SI1) were carried out using the crystallographic data file for CD-MCF.

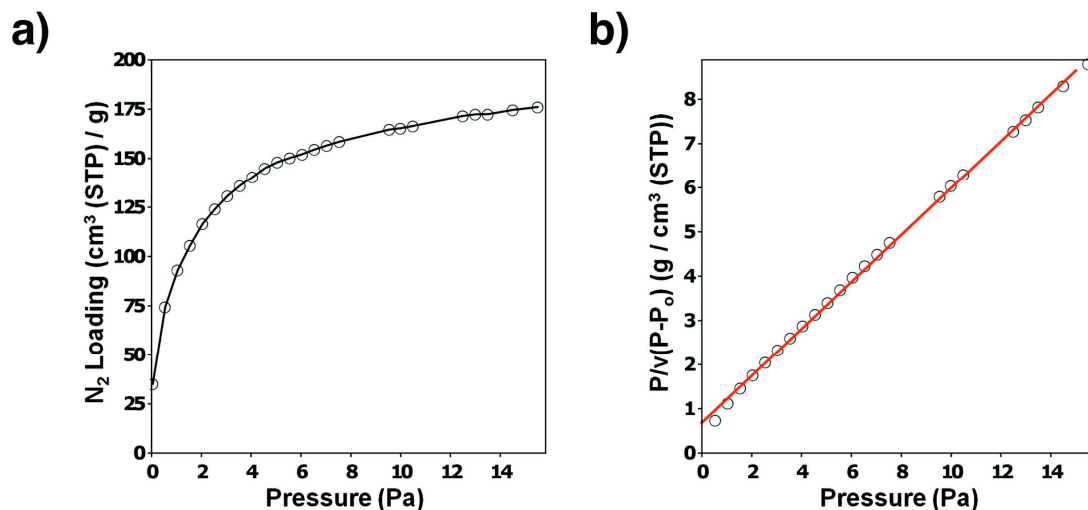

**Figure SI1.** a) Simulated adsorption N<sub>2</sub> isotherm for CD-MCF at 77 K. (b) BET analysis of the simulated isotherm shows that CD-MCF has an accessible surface area of 820 m<sup>2</sup>/g.

## Section 2. Computation studies for chiral and gas separation

The complex porosity of CD-MCF led us to investigate the possibility of its use as a material for chromatographic separations. The use of porous materials for stationary phases for chromatographic separations in both the single<sup>1</sup> and bulk crystalline states<sup>2</sup> has been investigated previously. Specifically, microporous materials that have homochiral components<sup>3</sup> are of interest for chiral separation processes. Here, we investigated the ability of CD-MCF to adsorb left-handed enantiomers selectively from racemic mixtures of 1,2-dimethylcyclobutane. Using multicomponent GCMC simulations, following the approach of Clark<sup>4</sup> and others<sup>5</sup> we find (Figure SI2a) that CD-MCF is indeed predicted to be enantioselective for (*SS*)-1,2-dimethylcyclobutane. The long helical void spaces of CD-MCF can also be useful for a different type of separation. As a result of the exceptionally tortuous and narrow nature of the helical cavities of CD-MCF, it is also a potentially useful adsorbent for size-selective separation of gas mixtures where the components are of similar size and shape, e.g., separating Xe and Kr mixtures. Using multicomponent GCMC simulations,<sup>6</sup> we here modeled the selective adsorption of Xe in CD-MCF from an industrially relevant mixture of 80/20 Xe/Kr gas. The simulation (Figure SI2b) shows that CD-MCF is predicted to be selective for Xe gas over Kr at intermediate pressures.

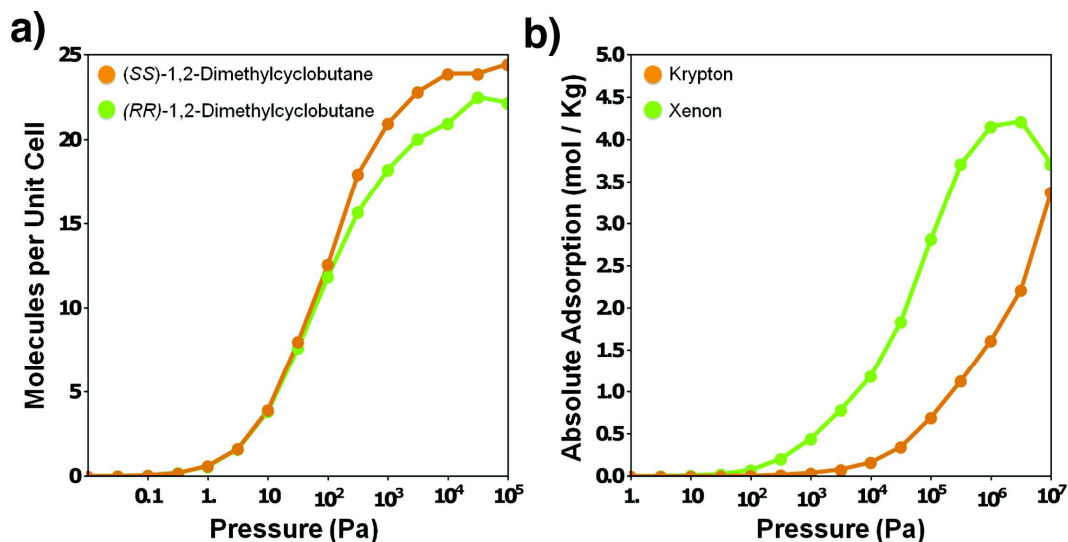

**Figure SI2.** (a) Simulated adsorption isotherms of the (*RR*) and (*SS*) enantiomers of 1,2-dimethylcyclobutane with CD-MCF. The simulation shows that there is a preference for the adsorption of the (*SS*) enantiomer near atmospheric pressure. (b) Simulated adsorption isotherms of a Xe/Kr mixture within CD-MCF. The simulation shows that CD-MCF has a preference for Xe over Kr at higher pressures.

- (1) Han, S.; Wei, Y.; Valente, C.; Lagzi, I.; Gassensmith, J. J.; Coskun, A.; Stoddart, J. F.; Grzybowski, B. A. *J. Am. Chem. Soc.* **2010**, *132*, 16358–16361.
- (2) a) Ahmad, R.; Wong-Foy, A. G.; Matzger, A. J. *Langmuir* **2009**, *25*, 11977–11979; b) Ameloot, R.; Liekens, A.; Alaerts, L.; Maes, M.; Galarneau, A.; Coq, B.; Desmet, G.; Sels, B. F.; Denayer, J. F. M.; De Vos, D. E. *Eur. J. Inorg. Chem.* **2010**, *2010*, 3735–3738; c) Gu, Z.-Y.; Jiang, D.-Q.; Wang, H.-F.; Cui, X.-Y.; Yan, X.-P. *J. Phys. Chem. C* **2009**, *114*, 311–316.
- (3) Valente, C.; Choi, E.; Belowich, M. E.; Doonan, C. J.; Li, Q.; Gasa, T. B.; Botros, Y. Y.; Yaghi, O. M.; Stoddart, J. F. *Chem. Commun.* **2010**, *46*, 4911–4913.
- (4) Clark, L. A.; Chempath, S.; Snurr, R. Q. *Langmuir* **2004**, *21*, 2267–2272.
- (5) a) Bao, X.; Broadbelt, L. J.; Snurr, R. Q. *Mol. Simul.* **2009**, *35*, 50–59; b) Bao, X.; Broadbelt, L. J.; Snurr, R. Q. *Phys. Chem. Chem. Phys.* **2010**, *12*, 6466–6473.
- (6) Ryan, P.; Farha, O. K.; Broadbelt, L. J.; Snurr, R. Q. *AIChE J.* **2011**, *57*, 1759–1766.
